# Supplementary material for: Elucidating Active CO–Au Species on Au/CeO2(111): A Combined Modulation Excitation DRIFTS and Density Functional Theory Study
Source: Springer Nature journal article supplement (doi:10.1007/s11244-022-01599-1), 2022-03-01
Supplement: MOESM1 [file 11244_2022_1599_MOESM1_ESM.pdf]

## Supporting Information

Elucidating Active CO-Au Species on Au/CeO<sub>2</sub>(111):

A Combined Modulation Excitation DRIFTS and

Density Functional Theory Study

Jakob Weyel<sup>†</sup>, Marc Ziemba<sup>†</sup>, Christian Hess<sup>\*</sup>

Eduard-Zintl-Institute of Inorganic and Physical Chemistry, Technical University of Darmstadt,  
Alarich-Weiss-Str. 8, 64287 Darmstadt, Germany

\*email: christian.hess@tu-darmstadt.de

<sup>†</sup>Both authors contributed equally

## ME-DRIFTS

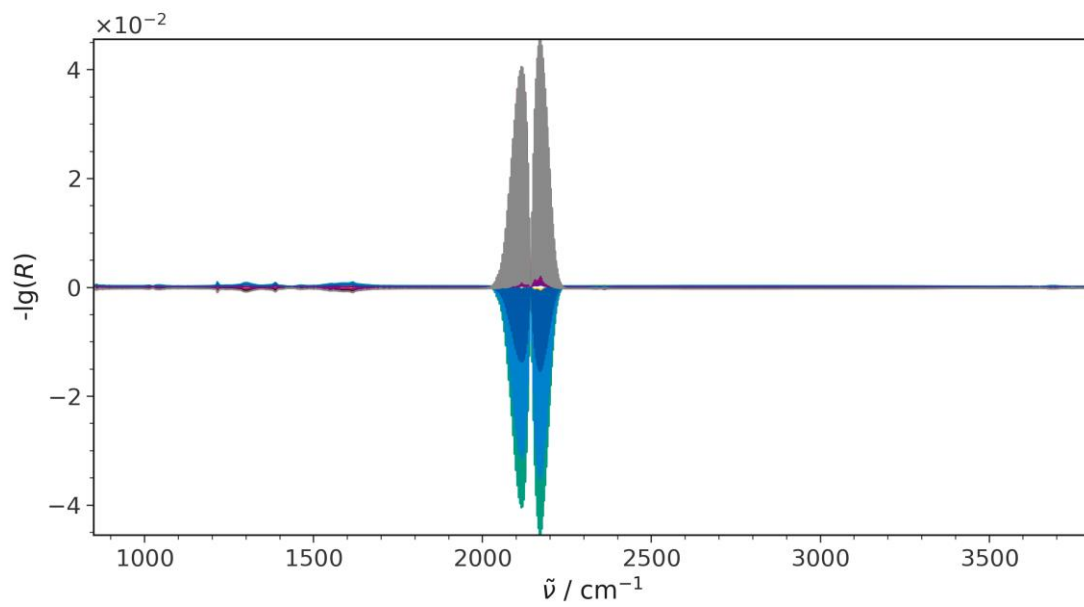

**Fig. S1:** PSD spectra of the entire spectral range of CeO<sub>2</sub> sheets.

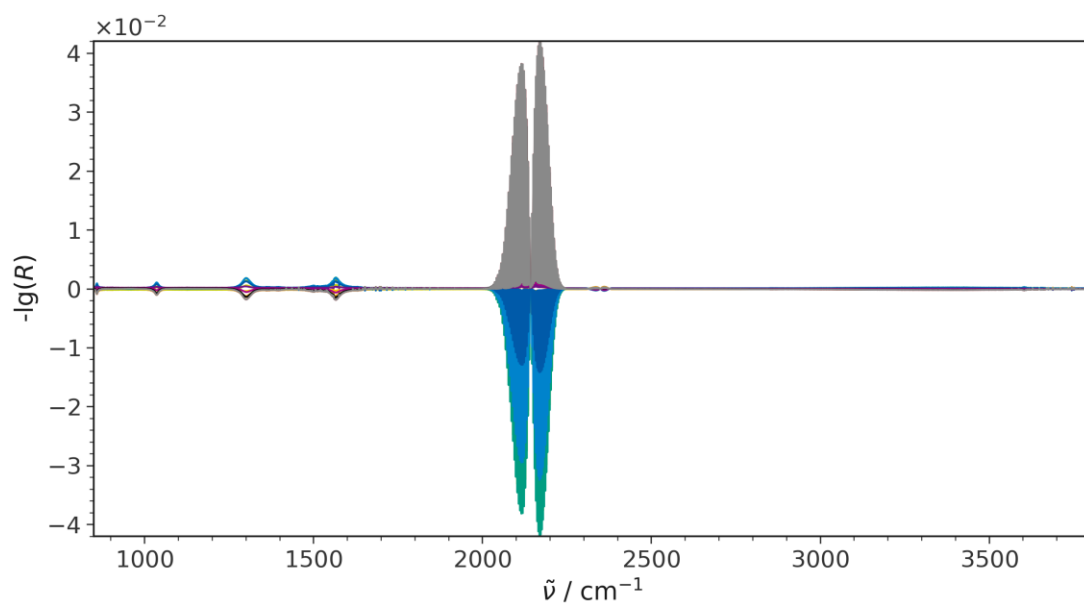

**Fig. S2:** PSD spectra of the entire spectral range of CeO<sub>2</sub> polyhedra.

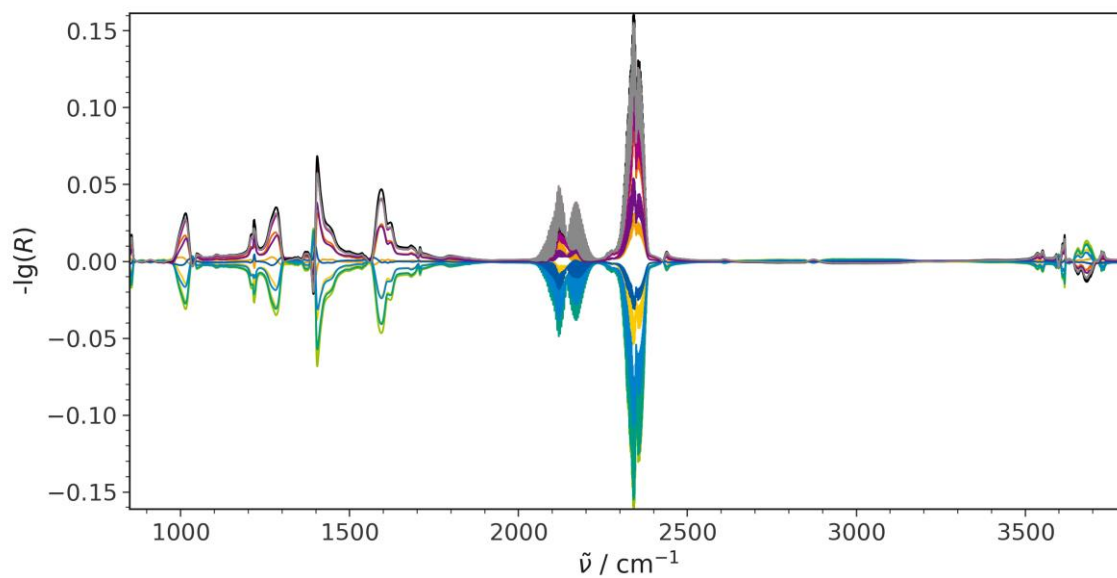

**Fig. S3:** PSD spectra of the entire spectral range of Au/CeO<sub>2</sub> sheets.

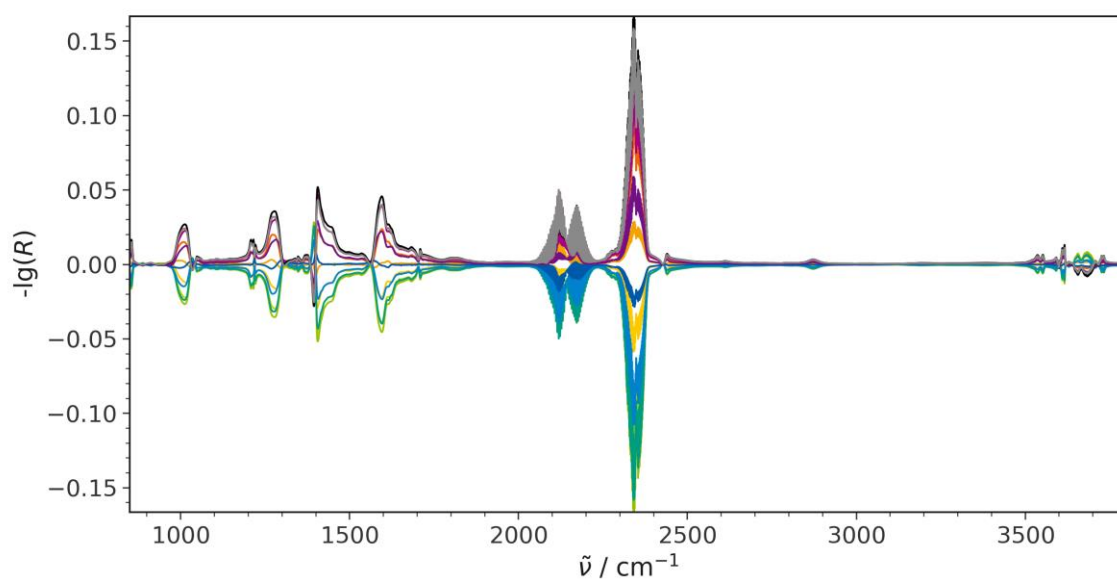

**Fig. S4:** PSD spectra of the entire spectral range of Au/CeO<sub>2</sub> polyhedra.

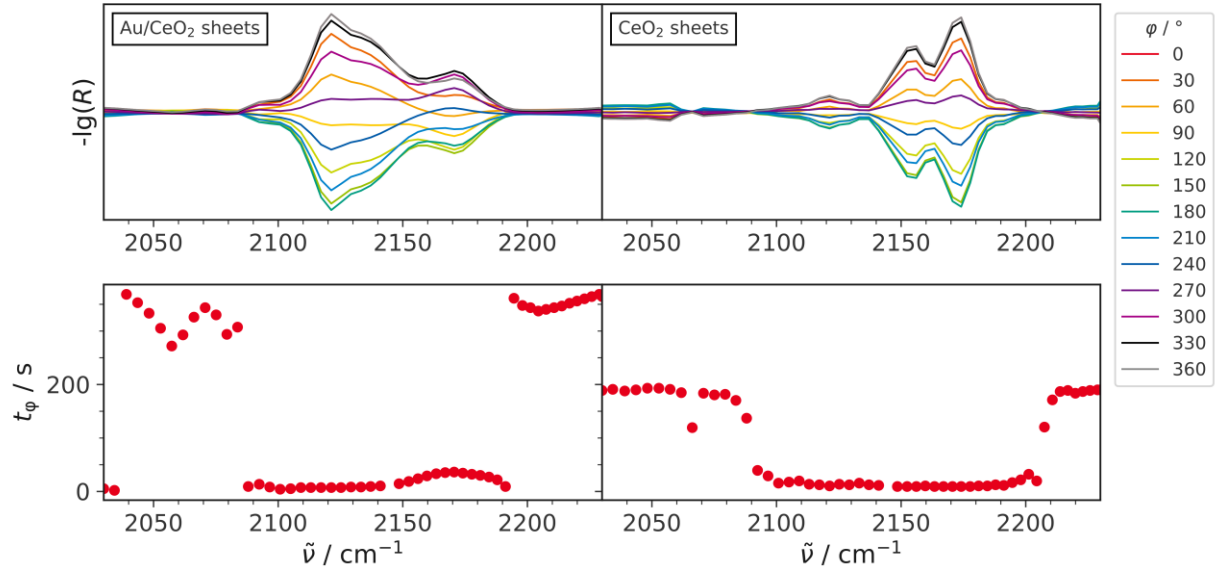

**Fig. S5: Top:** PSD spectra of the CO region of Au/CeO<sub>2</sub> (left) and CeO<sub>2</sub> (right) sheets after removal of gas-phase contributions. **Bottom:** Corresponding time shifts of individual spectral positions.

**Table S1:** Observed signals and their time values for gold-loaded ceria polyhedra. The same experiment has been executed three times and the maximum deviation  $\Delta_{\text{max}}$  for each signal is given in s.

| $\tilde{\nu} / \text{cm}^{-1}$ | $t(\text{Au/CeO}_2 \text{ I}) / \text{s}$ | $t(\text{Au/CeO}_2 \text{ II}) / \text{s}$ | $t(\text{Au/CeO}_2 \text{ III}) / \text{s}$ | $\Delta_{\text{max}} / \text{s}$ |
|--------------------------------|-------------------------------------------|--------------------------------------------|---------------------------------------------|----------------------------------|
| 2092                           | 18                                        | 21                                         | 21                                          | 3                                |
| 2122                           | 8                                         | 9                                          | 9                                           | 1                                |
| 2133                           | 9                                         | 11                                         | 11                                          | 2                                |
| 2156                           | 26                                        | 27                                         | 27                                          | 1                                |
| 2171                           | 42                                        | 43                                         | 42                                          | 1                                |
| 2359                           | 21                                        | 23                                         | 23                                          | 2                                |

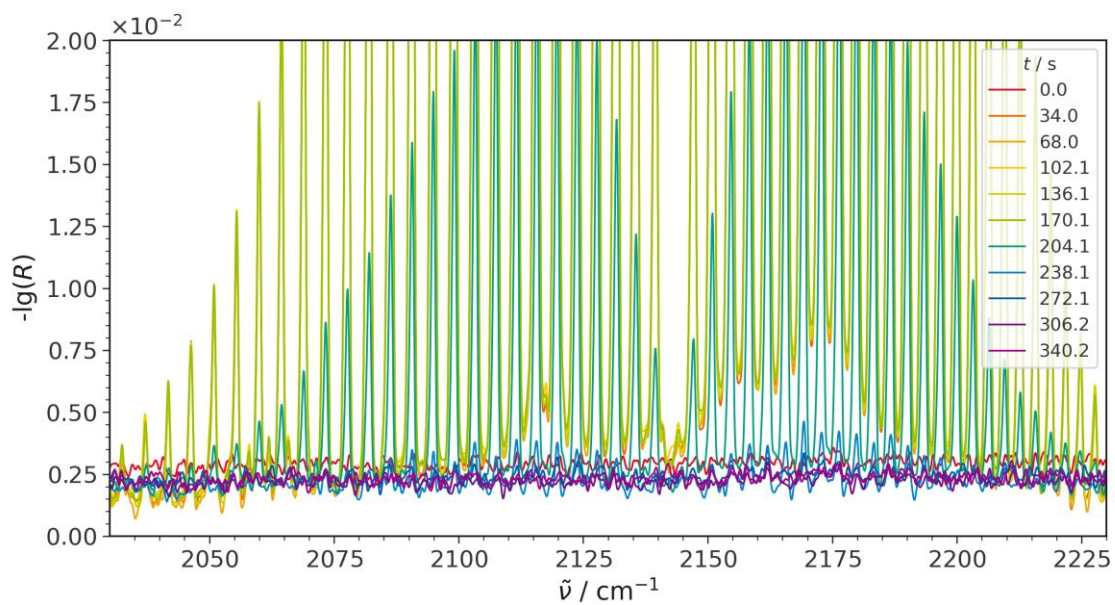

**Fig. S6:** Time-resolved spectra of the CO region of CeO<sub>2</sub> sheets.

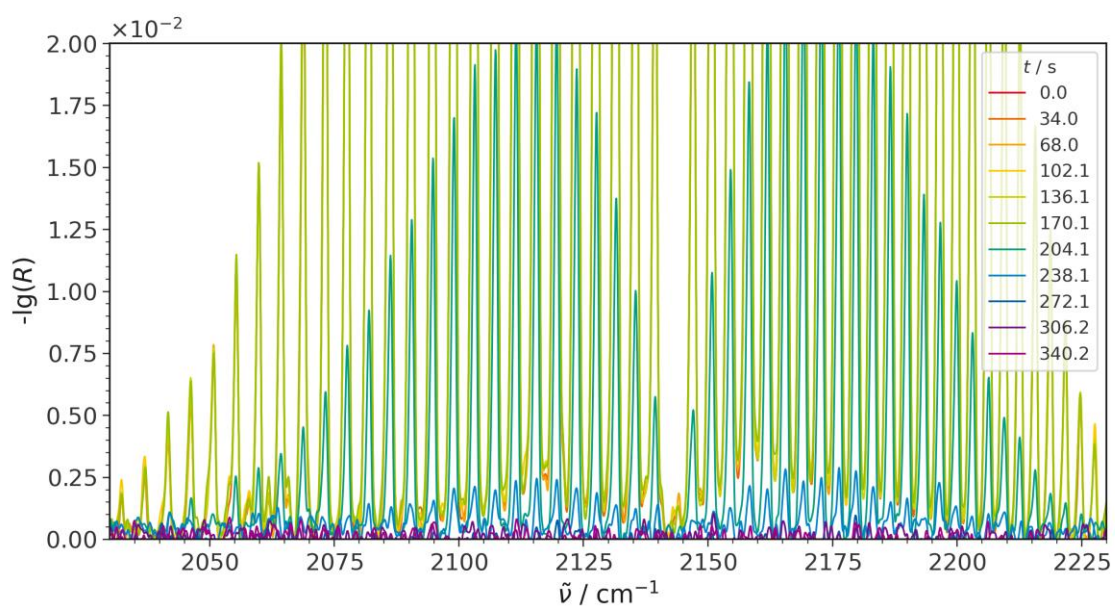

**Fig. S7:** Time-resolved spectra of the CO region of Au/CeO<sub>2</sub> polyhedra.

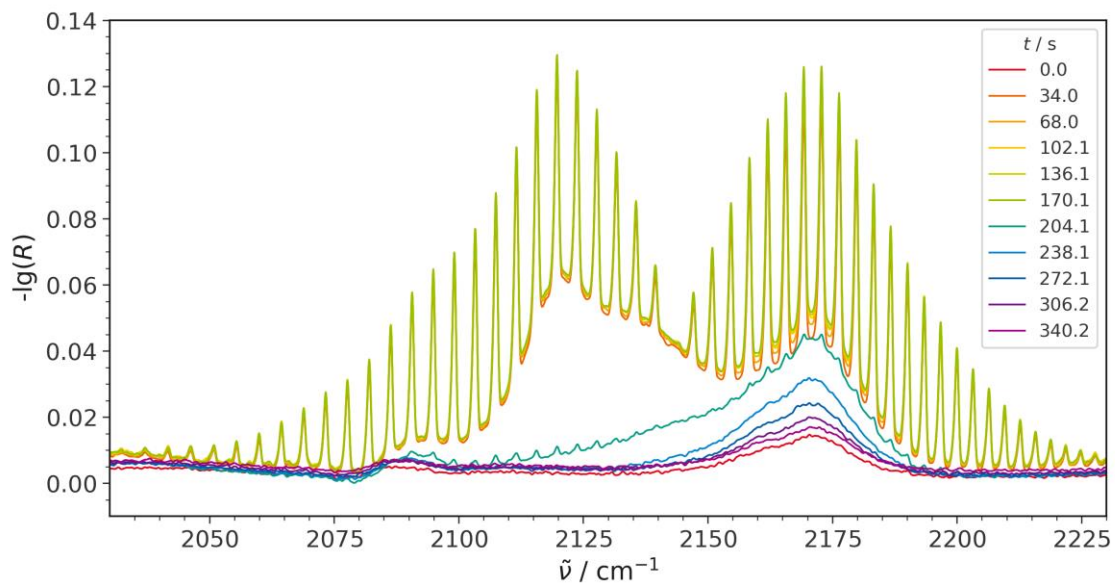

**Fig. S8:** Time-resolved spectra of the CO region of Au/CeO<sub>2</sub> sheets.

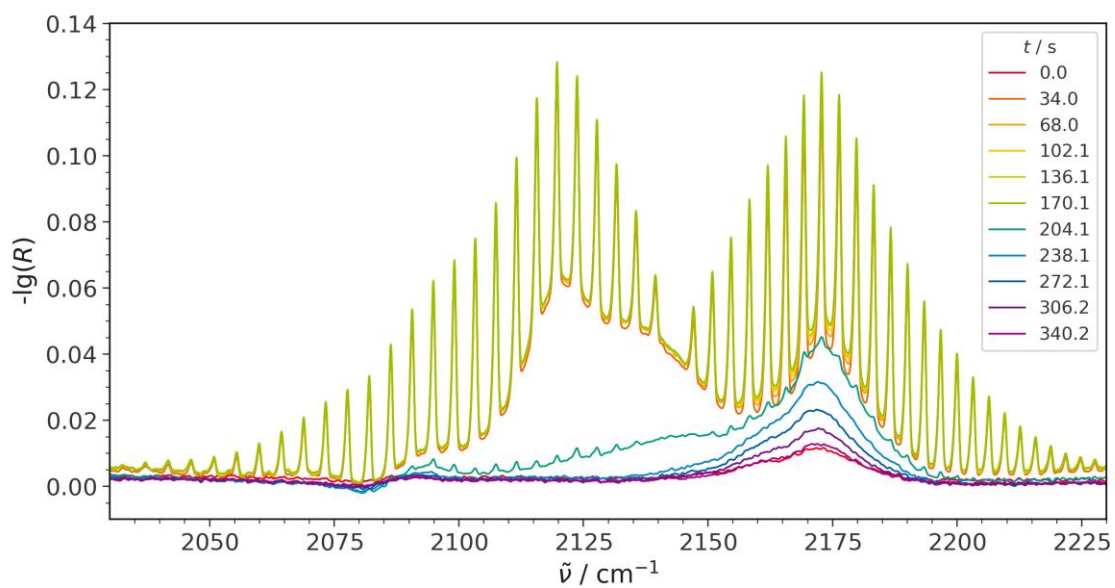

**Fig. S9:** Time-resolved spectra of the CO region of Au/CeO<sub>2</sub> polyhedra.
